# Supplementary material for: A Data-Driven Hybrid Random Forest and IMDPA Approach for Mapping Soil Degradation in Iranian Arid Lands
Source: Research Square preprint supplement (doi:10.21203/rs.3.rs-8313631/v1), 2025-12-17
Supplement: Supplementary file 1 [file 12f5e8c6a62834c214f2fdcb.docx]

**Table S1** Grading soil quality based on IQI models in two sets of TDS and MDS (Qi et al., 2009)

| Grading SQ | | | |
| --- | --- | --- | --- |
| IV | III | II | I | Method |
| IQITDS < 0.56 | 0.56≤ IQITDS < 0.66 | 0.66 ≤ IQITDS< 0.76 | IQITDS≥0.76 | TDS |
| IQIMDS  < 0.58 | 0.58 ≤IQIMDS  < 0.68 | 0.68 ≤ IQIMDS< 0.78 | 0.78 IQIMDS≥ | MDS |

**Table S2** List of used Environmental covariates

|  |  | **Covariates** | **Definition** | **Reference** | **Resolution** |
| --- | --- | --- | --- | --- | --- |
| **Parameters derived from DEM** | | Analytical hillshade | Angle between the surface and the incoming light beams | Conrad et al., 2015 | 30 m |
| Mass balance index | Balance between soil mass deposited and eroded | Conrad et al., 2015 | 30 m |
| Vertical distance to channel network | Calculates the vertical distance to a channel network base level | Conrad et al., 2015 | 30 m |
| Diurnal anisotropic heating | Calculates a simple approximation of the anisotropic diurnal heat | Conrad et al., 2015 | 30 m |
| Flow accumulation | Calculates accumulated ﬂow | Conrad et al., 2015 | 30 m |
| Effective air flow heights | Calculates effective air ﬂow heights | Conrad et al., 2015 | 30 m |
| Slope gradient | Average gradient above ﬂow path | Conrad et al., 2015 | 30 m |
| Valley depth | Relative position of the valley | Conrad et al., 2015 | 30 m |
| Terrain ruggedness index | Measure terrain ruggedness | Conrad et al., 2015 | 30 m |
| Average view distance | Land-surface parameters specific to topo-climatology | Conrad et al., 2015 | 30 m |
| Wind effect | Dimensionless index indicating areas exposed to wind | Conrad et al., 2015 | 30 m |
| Wind exposition | Dimensionless index highlighting wind-exposed pixels | Conrad et al., 2015 | 30 m |
| **vegetation indices** | | Difference vegetation index (DVI) | NIR - Red | Huete, 1988 | 30 m |
| Enhanced vegetation index (EVI) | G × (NIR - Red) / (NIR + c1 × Red - c2 × Blue + L) | Huete, 1988 | 30 m |
| Global vegetation index (GVI) | −0.29⋅ (G) −0.56 (Red) + 0.6 (IR) + 0.49 (ΝΙR) | Huete, 1988 | 30 m |
| Infrared percentage vegetation index (IPVI) | NIR / (NIR + Red) | Crippen, 1990 | 30 m |
| Normalized difference vegetation index (NDVI) | (Red - NIR) / (Red + NIR) | Foody et al., 2001 | 30 m |
| Blue | Reﬂectance value of Landsat satellite band | Landsat satellite | 30 m |
| Green | Reﬂectance value of Landsat satellite band | Landsat satellite | 30 m |
| Red | Reﬂectance value of Landsat satellite band | Landsat satellite | 30 m |
| Near infrared (NIR) | Reﬂectance value of Landsat satellite band | Landsat satellite | 30 m |
| Shortwave infrared (SWIR) | Reﬂectance value of Landsat satellite band | Landsat satellite | 30 m |
| Principal components of Landsat bands | PC1, PC2, PC3, and PC4 | Nield et al., 2007 | 30 m |
| Normalized-NDVI | (NIR - (TM1 + Green)) / (NIR + (TM1 + Green)) | Foody et al., 2001 | 30 m |
| Optimized soil-adjusted vegetation index (OSAVI) | (NIR - Red) / (NIR + Red + 0.16) | Rondeaux et al., 1996 | 30 m |
| PD 311 | Red - TM1 | Arzani and King, 2008 | 30 m |
| PD 312 | (Red - Blue) / (Red + TM1) | Arzani and King, 2008 | 30 m |
| PD 321 | Red - Green | Arzani and King, 2008 | 30 m |
| PD 322 | (Red - Green) / (Red + Green) | Arzani and King, 2008 | 30 m |
| Ratio-Based | NIR / (Blue + Green) | Arzani and King, 2008 | 30 m |
| Ratio vegetation index (RVI) | (NIR / Red) | Foody et al., 2001 | 30 m |
| Soil-adjusted vegetation index (SAVI) | [NIR - Red) / (NIR + Red + L)] × (1 + L) | Jordan, 1969 | 30 m |
| Stress- related | (TM1 × Green) / Red | Pettorelli et al., 2005 | 30 m |
| Transformed vegetation index (TVI) | (SWIR - Red) / (SWIR + Red) | Kullberg et al., 2017 | 30 m |
| VIT01 | Red / Thermal | Kullberg et al., 2017 | 30 m |
| VTI02 | Thermal / (Red + SWIR) | Kullberg et al., 2017 | 30 m |
| VIT03 | Thermal / Red | Kullberg et al., 2017 | 30 m |
| VIT04 | Thermal / (SWIR + Green) | Kullberg et al., 2017 | 30 m |
| Brightness index | BI = ((Red × Red) + (NIR × NIR))^0.5 | Khan et al., 2005 | 30 m |
| Normalized difference moisture index (NDMI) | NDMI = (NIR - SWIR) / (NIR + SWIR) | Wilson and Sader, 2002 | 30 m |
| Normalized difference snow index (NDSI) | NDSI = (Red - NIR) / (Red + NIR) | Major et al., 1990 | 30 m |
| **Soil salinity indices** | | Salinity index1 (S1) | S1 = Blue / Red | Nicolas. and Walter, 2006 | 30 m |
| Salinity index2 (S2) | S2 = (Blue - Red) / (Blue + Red) | Nicolas. and Walter, 2006 | 30 m |
| Salinity index3 (S3) | S3 = (Green × Red) / Blue | Nicolas. and Walter, 2006 | 30 m |
| Salinity index4 (S4) | S4 = (Blue × Red) / Green | Nicolas. and Walter, 2006 | 30 m |
| Salinity index5 (S5) | S5 = (Red × NIR) / Green | Nicolas. and Walter, 2006 | 30 m |
| Salinity index6 (S6) | S6 = (Blue × Red) ^0.5 | Nicolas. and Walter, 2006 | 30 m |
| Salinity index7 (S7) | S7 = (Green × Red) ^0.5 | Nicolas. and Walter, 2006 | 30 m |
| Salinity index8 (S8) | S8 = ((Blue)2 × (Green)2 × (Red)2) ^0.5 | Nicolas. and Walter, 2006 | 30 m |
| **Other environmental parameters** | | Land use map | Representing the uses of a "unit" of land | Landsat satellite | 30 m |
| Distance from mines | Euclidean distance to mines areas | Danielsson, 1980 | 30 m |
| Distance from urban | Euclidean distance to urban areas | Danielsson, 1980 | 30 m |
| Distance from population | Euclidean distance to population centers | Danielsson, 1980 | 30 m |
| Distance from river | Euclidean distance to the rivers | Danielsson, 1980 | 30 m |
| Distance from road | Euclidean distance to the roads | Danielsson, 1980 | 30 m |
| Geology map | Representing the various geological features | Fathizad et al., 2020 | 30 m |
| Groundwater quality parameters | HCO3−, Cl−, SO4 2−, Na+, Ca2+, Mg2+, EC, TH, SAR, and TDS | Fathizad et al., 2020 | 30 m |

**Table S4 Descriptive statistics of soil sample physical and chemical characteristics**

| Average standard error | Median | Standard deviation | Variance | Skewness | Average | Minimum | Maximum | Parameter |
| --- | --- | --- | --- | --- | --- | --- | --- | --- |
| 0.01 | 0.55 | 0.15 | 0.02 | -0.54 | 0.51 | 0.19 | 0.76 | Soil quality |
| 0.02 | 7.76 | 0.31 | 0.09 | -0.03 | 7.77 | 6.76 | 8.63 | pH |
| 0.91 | 12.5 | 27.13 | 736.05 | 2.10 | 21.6 | 0.6 | 130.6 | EC (dS/m) |
| 1.03 | 6.27 | 14.69 | 216.07 | 8.45 | 12.13 | 0.42 | 100.46 | SAR |
| 0.07 | 0.95 | 0.99 | 0.97 | 2.18 | 1.2 | 0.04 | 6.08 | Fe (mg/kg-1) |
| 0.14 | 0.86 | 2.04 | 4.16 | 2.64 | 1.67 | 0.18 | 10.60 | Mn (mg/kg-1) |
| 0.03 | 0.20 | 0.49 | 0.24 | 4.6 | 0.32 | 0.0 | 3.58 | Ni (mg/kg-1) |
| 0.07 | 1.06 | 1.03 | 1.06 | 1.74 | 1.36 | 0.0 | 6.74 | Pb mg/kg-1) |
| 0.02 | 0.34 | 0.39 | 0.15 | 1.7 | 0.50 | 0.0 | 2.16 | Zn (mg/kg-1) |

|  | pH | EC | Pb | SAR | Fe | Mn | Ni | Zn |
| --- | --- | --- | --- | --- | --- | --- | --- | --- |
| pH | 1 | **-0.588**** | 0.051 | **-0.148*** | -0.105 | 0.124 | -0.046 | 0.103 |
| EC |  | 1 | -0.078 | **0.375**** | **0.352**** | -0.124 | 0.061 | 0.034 |
| Pb |  |  | 1 | 0.001 | **-0.163*** | 0.007 | 0.043 | -0.028 |
| SAR |  |  |  | 1 | 0.044 | -0.028 | -0.039 | -0.086 |
| Fe |  |  |  |  | 1 | -0.029 | -0.038 | **0.292**** |
| Mn |  |  |  |  |  | 1 | -0.045 | 0.161 |
| Ni |  |  |  |  |  |  | 1 | -0.051 |
| Zn |  |  |  |  |  |  |  | 1 |
| *. Correlation is significant at the 0.05 level (2-tailed); **. Correlation is significant at the 0.01 level (2-tailed). | | | | | | | | |

**Table S5** Matrix of Pearson correlation coefficients between soil variables in surface samples in the study area

**Table S7** Grading the concentration of soil parameters of the study area

| Salinity constraint | EC (dS m-1) | Parameter | Heavy metal concentration  (mg kg-1) | Parameter | Heavy metal concentration  (mg kg-1) |
| --- | --- | --- | --- | --- | --- |
| Very low | <4 |  | 0-1 |  | 0-0.3 |
| Low | 4-8 |  | 1-1.5 |  | 0.3-0.6 |
| Moderate | 8-12 | Pb | 1.5-2 | Zn | 0.6-0.9 |
| High | 12-16 |  | 2-2.5 |  | 0.9-1.2 |
| Very high | 16-32 |  | > 2.5 |  | > 1.2 |
| Extremely high | > 32 |
|  |  |
| Soil quality constraint | **Soil quality** | **pH value** | **Class** | **SAR value** | **Class** |
| Very low | 0.4 > | 7-7.5 | I | 0-10 | Low |
| Low | 0.4-0.5 | 7.5-8 | II | 10-15 | Moderate |
| Moderate | 0.5-0.6 | 8-8.5 | III | 15-20 | High |
| Good | > 0.6 | > 8.5 | IV | > 20 | Very high |
|  |  |  |  |  |  |
| Parameter | **Heavy metal concentration**  **(mg kg-1)** | **Parameter** | **Heavy metal concentration**  **(mg kg-1)** | **Parameter** | **Heavy metal concentration**  **(mg kg-1)** |
|  | 0-2 | Ni | 0-0.5 | Fe | 0-1 |
| Mn | 2-4 |  | 0.5-1 |  | 1-2 |
|  | 4-6 |  | 1-1.5 |  | 2-3 |
|  | > 6 |  | > 1.5 |  | > 3 |

**Table S9** Relationship Between Environmental and Soil Parameters with IMDPA Model Indicators

| **Environmental / Soil Parameter** | **Role in IMDPA Model** | **Reference** |
| --- | --- | --- |
| Electrical Conductivity (EC) | Indicator of soil salinity and soil structure degradation | Shi et al., 2021; Squires & Glenn, 2011 |
| Sodium Adsorption Ratio (SAR) | Evaluation of soil sodicity and permeability reduction | Jiang et al., 2022 |
| Soil Quality Index (SQI) | Overall soil health and stability assessment | Masoudi & Zakerinejad, 2011 |
| Heavy Metal Concentrations (Pb, Zn, Ni) | Indicator of pollution and anthropogenic impact | Yang et al., 2018 |
| Vegetation Indices (NDVI, SAVI) | Proxy for vegetation health and soil protection | Wang et al., 2023 |
| Topographic Data (Slope, TWI) | Influence on erosion, runoff, and mineral accumulation | Behrens et al., 2018; Du Plessis et al., 2020 |
| Climate (Precipitation, Temperature, Aridity) | Impact on soil formation and desertification processes | Reed & Stringer, 2015 |
| Human Activities (Population, Mining) | Role in soil degradation and accelerating desertification | Masoudi & Zakerinejad, 2011; Yang et al., 2018 |
